# Supplementary material
Source: publisher figshare collection journal article supplement (https://frontiersin.figshare.com/ndownloader/files/15250457)
Supplement: Supplementary file [file 15250457]

# **Tubgcp3 is required for retinal progenitor cell proliferation during zebrafish development**

**Running title: Tubgcp3 in zebrafish retinal development**

Guobao Li<sup>1,2</sup>, Daqing Jin<sup>1,2</sup>, \*, Tao P. Zhong<sup>1,2</sup>, \*

**Supplementary Material consists of 8 Figures (Supplementary Figure 1-8).**

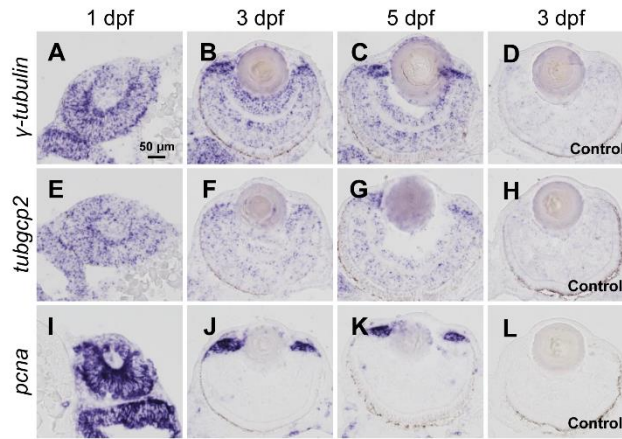

**Supplementary Figure 1. Expression of *tubgcp2*,  $\gamma$ -*tubulin* and *pcna* during zebrafish retinal development.** (A-C) ISH analyses showing the expression of  $\gamma$ -*tubulin* throughout the retina at 1 dpf and enriched at the CMZ from 3 dpf to 5 dpf (E-G) *tubgcp2* expression is similar to that of  $\gamma$ -*tubulin*. (I-K) *pcna* expression is throughout the retina at 1 dpf but progressively confined to the CMZ. (D, H, L) sense probes for  $\gamma$ -*tubulin*, *tubgcp2* and *pcna* are used as controls. Scale bars: 50  $\mu$ m (A-L).

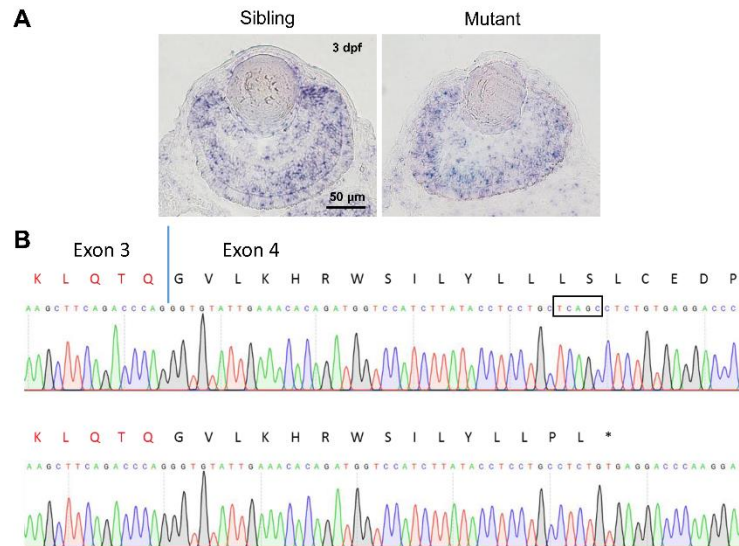

**Supplementary Figure 2. The mutated *tubgcp3* mRNA escaped the nonsense-mediated decay (NMD) in the *tubgcp3* mutants. (A)** ISH analyses show the expression of *tubgcp3* transcripts are detected in wild-type sibling and the *tubgcp3* mutant retina at 3 dpf. **(B)** Sanger sequencing of *tubgcp3* cDNA from the *tubgcp3* mutant embryos reveals a 5-nucleotide (nt) deletion (black box) in *tubgcp3* mRNA. The deletion is predicted to cause a premature stop codon (asterisk) in Tubgcp3 protein in the *tubgcp3* mutants. Scale bars: 50  $\mu$ m (A).

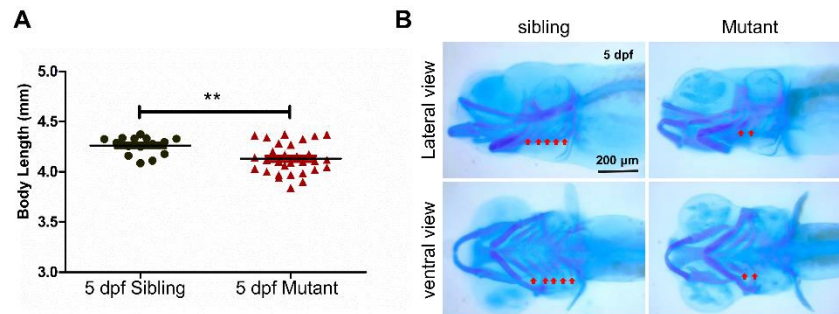

**Supplementary Figure 3. The *tubgcp3* mutants exhibit short body length and branchial arch defects.** (A) Scatter plot of body length from wild-type sibling and the *tubgcp3* mutant embryos at 5 dpf. Data are from 15 embryos for the wild-type sibling group and 30 for the *tubgcp3* mutant group. Student's t-test: \*\* $P < 0.01$ . (B) Alcian blue staining for cartilage in 5 dpf wild-type sibling and the *tubgcp3* mutant embryos. Arrows indicate the positions of branchial arches. Scale bars: 200 μm (B).

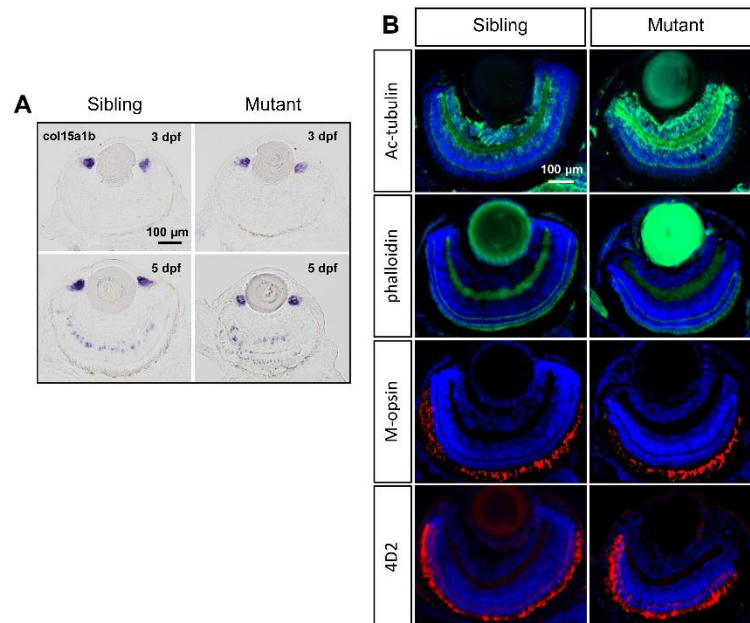

**Supplementary Figure 4. The *tubgcp3* mutants exhibit normal retinal cell types and retinal laminar structures.** (A) *col15a1b* (RSCs marker) is expressed in wild-type sibling and the *tubgcp3* mutant CMZ. (B) Microscopy images of several retinal cell types and laminar structures in wild-type siblings and the *tubgcp3* mutants at 5 dpf. The *tubgcp3* mutants exhibit normal cones (labeled with anti-M-opsin for cone outer segments), rods (labeled with anti-4D2 for rod outer segments) and cilia in photoreceptor cells (labeled with anti-acetylated  $\alpha$ -tubulin). The inner segment, inter plexiform layer (IPL), outer limiting membrane (OLM) and outer plexiform layer (OPL) (labeled with phalloidin) are normal in the *tubgcp3* mutant retinæ. The nuclei are counterstained with DAPI (blue). Scale bars: 100  $\mu$ m (A,B).

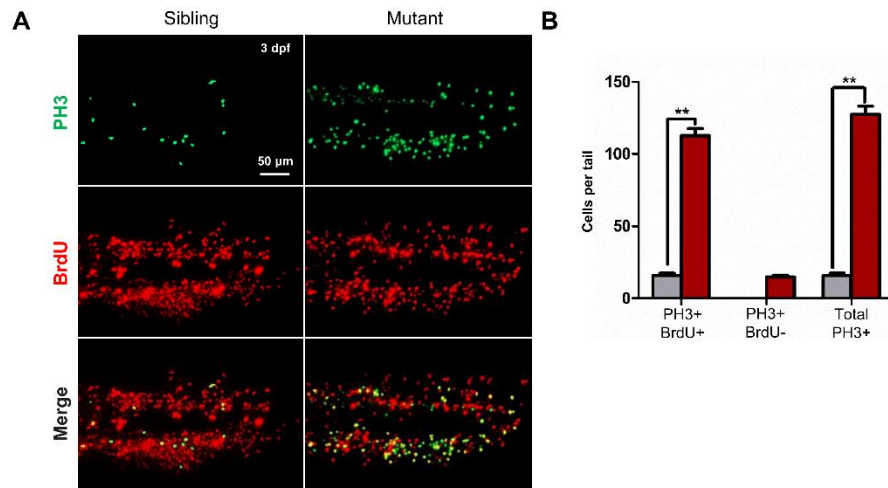

**Supplementary Figure 5. Depletion of Tubgcp3 causes cell cycle arrest in M-phase in the *tubgcp3* mutant tails.** (A) Immunostaining analysis of cell proliferation in zebrafish tails at 3 dpf using anti-BrdU (red) and anti-PH3 (green) antibodies. Zebrafish embryos are treated with BrdU from 66 hpf to 72 hpf for the double staining. The immunostaining results displaying significantly increased PH3+ cells in the *tubgcp3* mutant tails compared to wild-type siblings. Note that PH3+ BrdU- cells are observed in the *tubgcp3* mutants but absent in wild-type siblings. (B) Bar charts depicting quantification of BrdU- and PH3-labeled cells in wild-type sibling and the *tubgcp3* mutant tails. Data are mean + SEM from 16 embryos for each group. Student's t-test: \*\* $P < 0.01$ . Scale bars: 50  $\mu$ m (A).

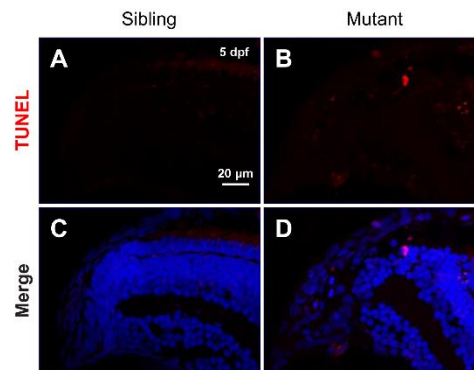

**Supplementary Figure 6. Loss of Tubgcp3 in RSCs does not induce cell death.**  
 (A-D) TUNEL assay of 5 dpf eye sections exhibiting no TUNEL+ cells in the location of RSCs in the *tubgcp3* mutant retina. Scale bars: 20 μm.

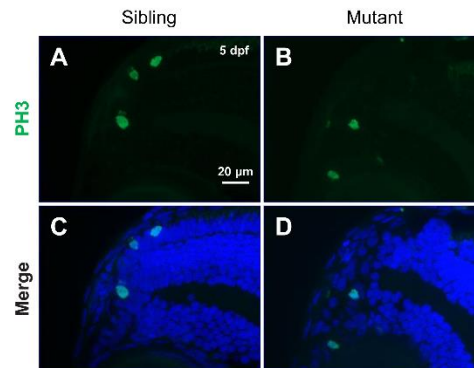

**Supplementary Figure 7. Loss of *Tubgcp3* in RSCs does not cause mitotic arrest.**  
 (A-D) Immunostaining analyses showing the expression of PH3 (a mitosis marker) in the *tubgcp3* mutant and wild-type sibling retina at 5 dpf. Scale bars: 20 μm.

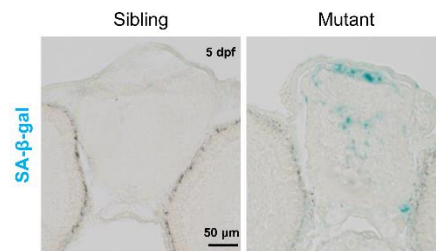

**Supplementary Figure 8. Depletion of Tubgcp3 induces senescence in the *tubgcp3* mutant brains. (A, B)** SA-β-gal staining of 5 dpf head cryosections displaying obviously increased SA-β-gal expression in the *tubgcp3* mutants compared to the wild-type siblings. Scale bars: 50 μm.
